# Supplementary material for: Screening of Polyethylene-Degrading Bacteria from Rhyzopertha Dominica and Evaluation of Its Key Enzymes Degrading Polyethylene
Source: MDPI journal article supplement (doi:10.3390/polym14235127), 2022-11-25
Supplement: s1 [file s1]

## Supplementary information

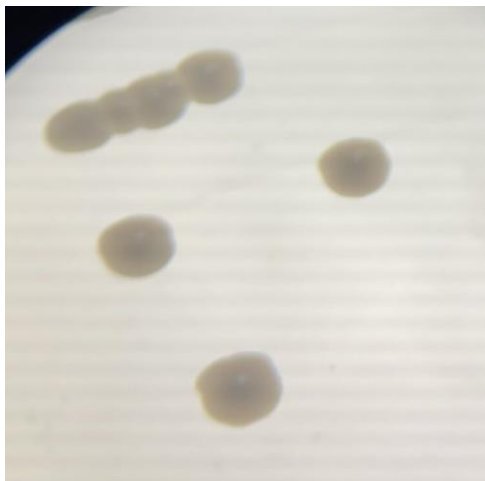

(A)

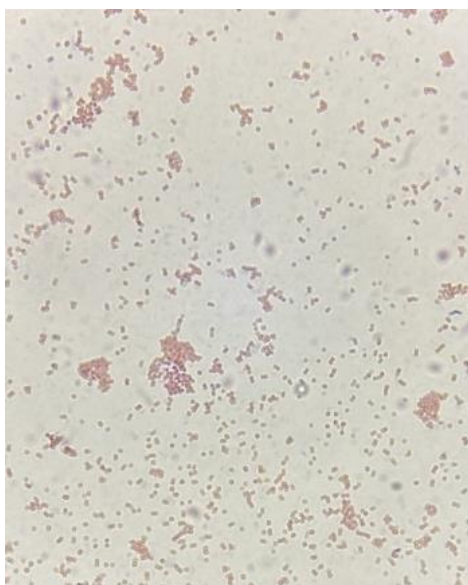

(B)

**Figure S1.** Colony morphology of *Acinetobacter Baumannii* Rd-H2 in the medium(A) and Gram staining results of *Acinetobacter Baumannii* Rd-H2 under microscope(B).

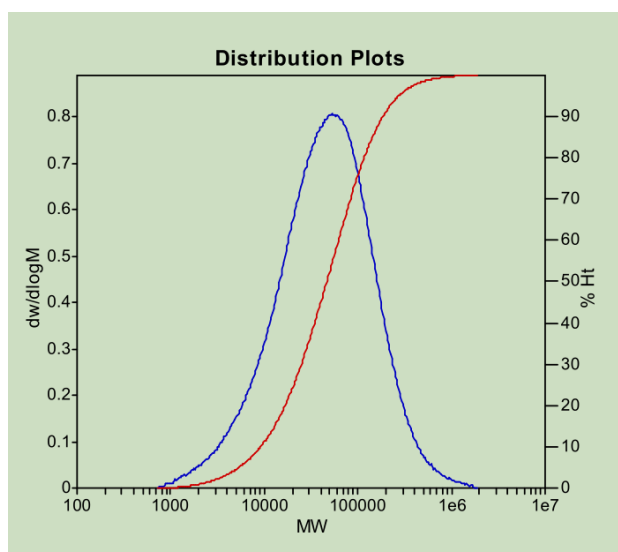

(A)

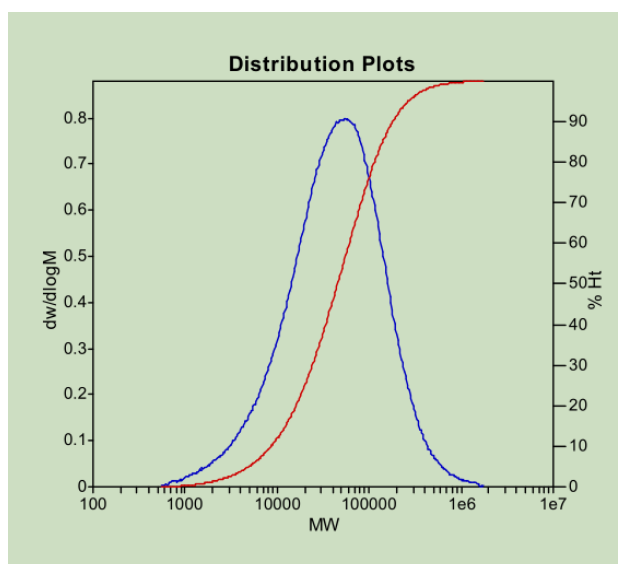

(B)

**Figure S2.** GPC analysis of the PE treated by the LCFBM medium incubated without (A) or with (B) strain Rd-H2 for 30 days.

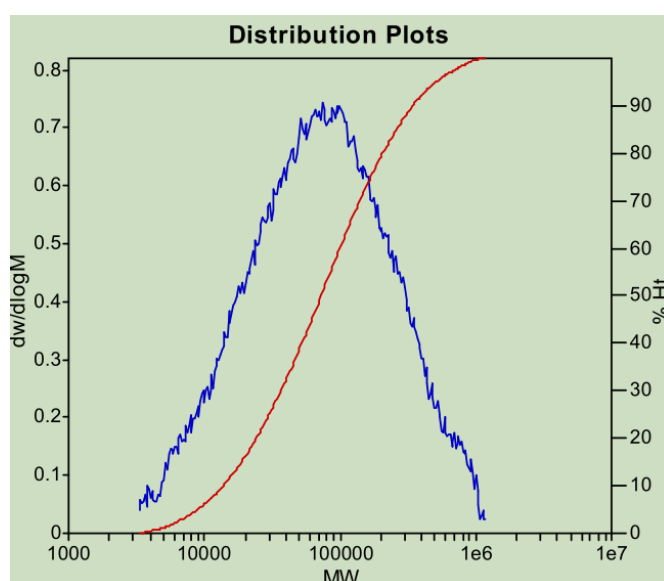

(A)

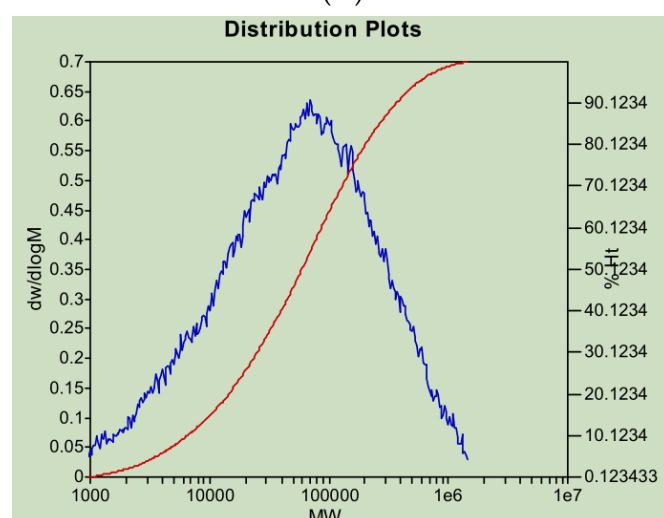

(B)

**Figure S3.** GPC analysis of the PE treated without (A) or with (B) AbMCO for 10h.

The sequence of the sequencing result of the pET-28a-AbMco:

GATCCGCAATTAAGGAATATCACCTTAATATTAATGAACAACAAGTCAATGTTACGGGCAAACCCCTTAAAC  
 GAATTACCGTAAATGGAAAATTTACAGCACCCTCCTTGAGTTTGAAGAGGGGGATGAGGCTGTTATTCGCG  
 TCCATAATCAATTAAGAATCAAGATACCTCTTTACACTGGCATGGGTTGTTACTGCCAGGGTTAATGGATGG  
 TGTGCCGGGTTTTAATAATTTTAAAGGGATTGCTCCAAATGGAGATTTTGTGTTACCGCTTTAAGGTGAAACAA  
 AATGGCACATATTGGTATCACGCCCATAGTAAAGGCCAAGAGCAAGACGGTTTATATGGGCCGCTTGTGATT  
 TACCCAAAAGGCAAAATACCAGTTGCGGCGCATGAAAAAATCTGCTGAGTATTATCAAAACCGCCGTG  
 TTCCATGATTCTTCTAGCGATAGCATTATGAAGAATTTGAAAAAATCTGCTGAGTATTATCAAAACCGCCGTG  
 AAATGTATCTGATGTATGGAAGCAAGTTAAAGCACAGGGCTTAAAGCAACTTGGCAAGATCGTTCGATGT  
 GGAATCAGATGCGGATGTTAAAAACCGATATGTCTGATGTGACGGGCTATACCTTCTTAGTCAACGGCAAGA  
 CTCCTCAGCAAACTGGACAGCTAATTTTAAAGCTGGTGATAAGGTTTCGATTGCGATTATTATTAATGCATCAGC  
 AATGTCATTTTTTGATGTCAGAATTCCAAATTTGAAAATGACAGTTGTAAGTGCAGATGGGCAGCCAGTAAAA

CCTGTAGCAATTGATGAGTTTCGTATTGGTACAGCTGAAACCTACGATGTCATTGTGGAACCTAAACAGCCAA  
ATTATCAGATTGAAGCAGAGTCTATTGACCGTAGTGGTTTTGCTATCGGTACTTTGCACAATGAAAATACGCA  
GGCTGTGGGGCCAGTCCAAATGCCAATACCACGCCCACGTGCTTTATTGACCATGGATGATATGGGCATGAG  
TCATGGTGATGGAAGTAATGAACATGCTGGCCATCAAATGAACATGCAACATGACATGTCGGCCATGCCTGA  
AATGAAAAAAGAGACGAGTCAGGCTAATCATGATCACACAGTGATGAAAATGGATCATGACATGAAAAATA  
TGTCATCTGGCGAACATGATCATTCCATGATGCACATGAAGCATGATATGTCAGCGATGTCTGAAATGAAGC  
ATGATATGCAGGCAATGTCATCTAGCGAGCATGACCACACTATGATGAATATGAATCATGAGATGCCTGCTC  
AATCTGAGAATAAGTCTAAAAAGGATGAACCAGTTTATGGCTGGGCAAATGCTTCAACGCCAGCGGGTATGA  
AAGCACTGCAATATAGCGATTTGCAATCTTTAACACCTCAGCCAGATACCCGTGCGCCCGAACGAGAATTAG  
TCATTTCGTTTAGGTGGCAACATGGAGCGTTATATCTGGACCATTAATGGCAAGAAATTTAGTGACACGATACC  
TTTACAAGTTAAGTATGGTGAACGCATACGCTTGAAGTTTGTGAATGACAGTATGATGGCTCATCCAATGCAT  
TTACATGGCATGTTTATGCAATTGGAAAAATGGTCAACAAGCTGAAAATTTACCAAATAAACATACTATTATTG  
TTCCACCCGGAAAGACCGTTACGGCGTTATTGACAGCCGATGCTTTGGGAGAATGGGCGATTTCATTGCCATCT  
GCTCTATCACATGAGTGCTGGAATGATGAATAAATTAATTGTTGCTCAAGTCAACGATGGACAACAACCCGC  
TCAGTCCCAGCCAACTGTTCAATCTGAAAATGAGAAAGGAGCTAGTCATGCGCATCACTAA
